# Supplementary material
Source: Royal Society of Chemistry journal article supplement (doi:10.1039/d5cp04645a)
Supplement: d5cp04645a1.pdf [file d5cp04645a1.pdf]

## Supporting Information

### Computational Investigation of Formaldehyde Adsorption on Nitrogen-Doped- $\gamma$ -Graphyne: Modulation by External Electric Field and Mechanical Strain

Upasana Nath, Rimi Chyrmang, and Manabendra Sarma\*

Department of Chemistry, Indian Institute of Technology Guwahati, Assam- 781039, India

Email: [msarma@iitg.ac.in](mailto:msarma@iitg.ac.in)

## Table of Contents

| Sl. No. | Description                                                                                                                                                                                                                                      | Page No.  |
|---------|--------------------------------------------------------------------------------------------------------------------------------------------------------------------------------------------------------------------------------------------------|-----------|
| 1       | <b>Table S1:</b> Benchmark of structural and electronic properties of pristine $\gamma$ -graphyne.                                                                                                                                               | <b>S3</b> |
| 2       | <b>Figure S1:</b> Lattice constant (LA) plots of (a) 1N- $\gamma$ -graphyne, (b) 2N- $\gamma$ -graphyne, and (c) 3N- $\gamma$ -graphyne.                                                                                                         | <b>S3</b> |
| 3       | <b>Figure S2:</b> Formation energy ( $E_{form}$ ) plots of the N-doped $\gamma$ -graphyne system having different nitrogen doping concentrations.                                                                                                | <b>S4</b> |
| 4       | <b>Figure S3:</b> Potential Energy Curves (PECs) of (a) 1N- $\gamma$ -graphyne, (b) 2N- $\gamma$ -graphyne, and (c) 3N- $\gamma$ -graphyne.                                                                                                      | <b>S5</b> |
| 5       | <b>Figure S4:</b> Average Electrostatic Potential plots of (a) 1N- $\gamma$ -graphyne, (b) 2N- $\gamma$ -graphyne, (c) 3N- $\gamma$ -graphyne, and (d) Work function ( $\phi$ ) plots before and after adsorption of H <sub>2</sub> CO molecule. | <b>S6</b> |

**Table S1:** Benchmark of structural and electronic properties of pristine  $\gamma$ -graphyne.

| Parameters          | Our Results      | Previous Results     |
|---------------------|------------------|----------------------|
| Lattice Constant    | 6.89 Å           | 6.89 Å [1]           |
| Electronic band gap | 0.42 eV (Direct) | 0.46 eV (Direct) [1] |
| Work function       | 4.99 eV          | 5.17 eV [2]          |

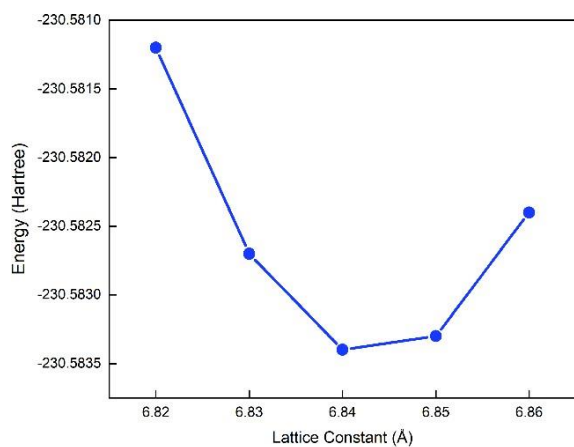

(a)

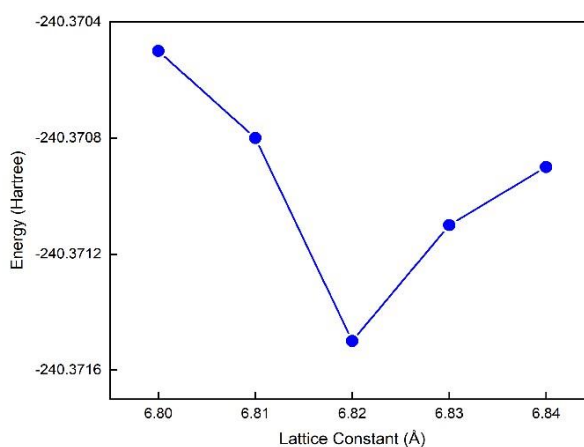

(b)

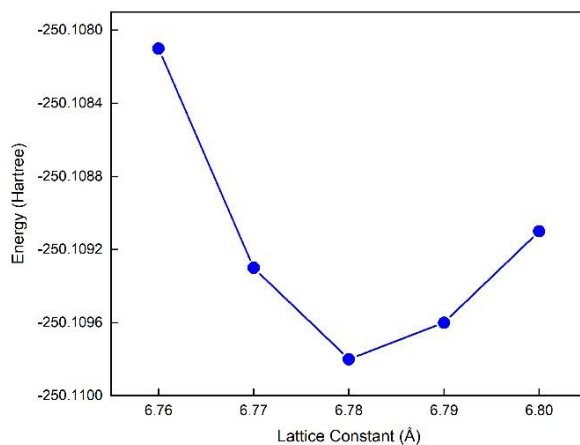

(c)

**Figure S1:** Lattice constant (LA) plots of (a) 1N- $\gamma$ -graphyne, (b) 2N- $\gamma$ -graphyne, and (c) 3N- $\gamma$ -graphyne.

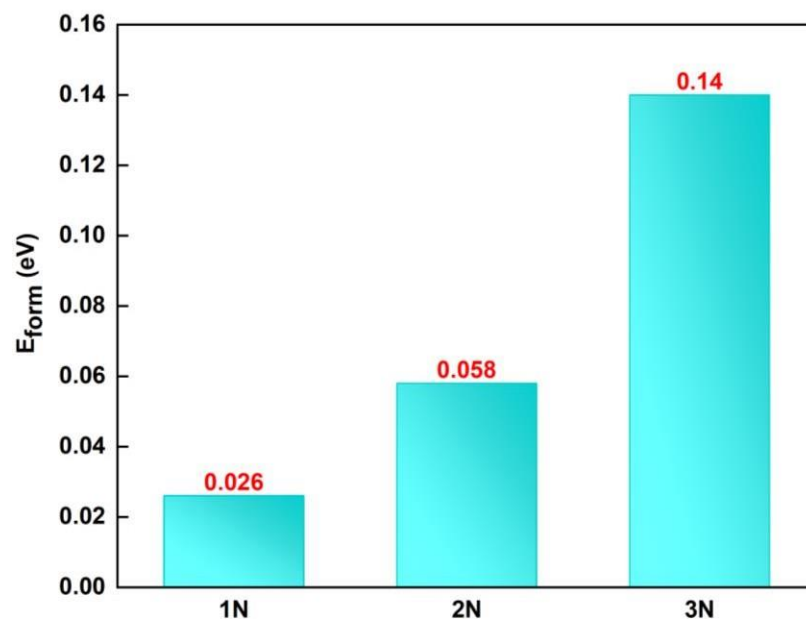

**Figure S2:** Formation energy ( $E_{form}$ ) plots of the N-doped- $\gamma$ -graphyne system having different nitrogen doping concentrations.

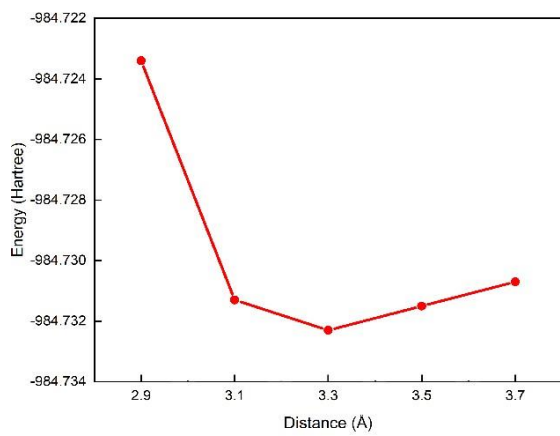

(a)

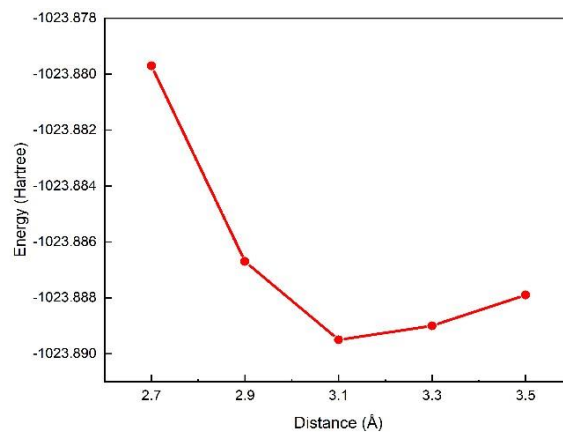

(b)

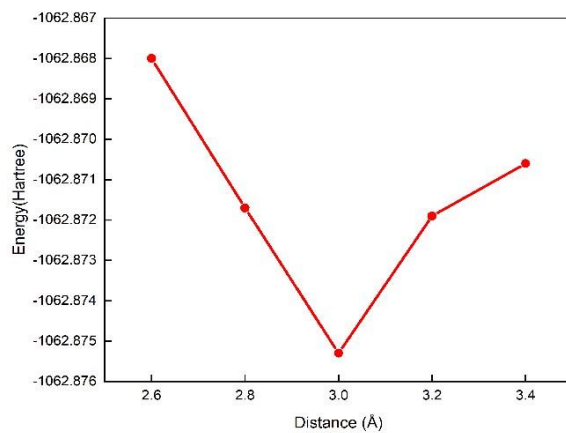

(c)

**Figure S3:** Potential Energy Curves (PECs) of (a) 1N- $\gamma$ -graphyne, (b) 2N- $\gamma$ -graphyne, and (c) 3N- $\gamma$ -graphyne.

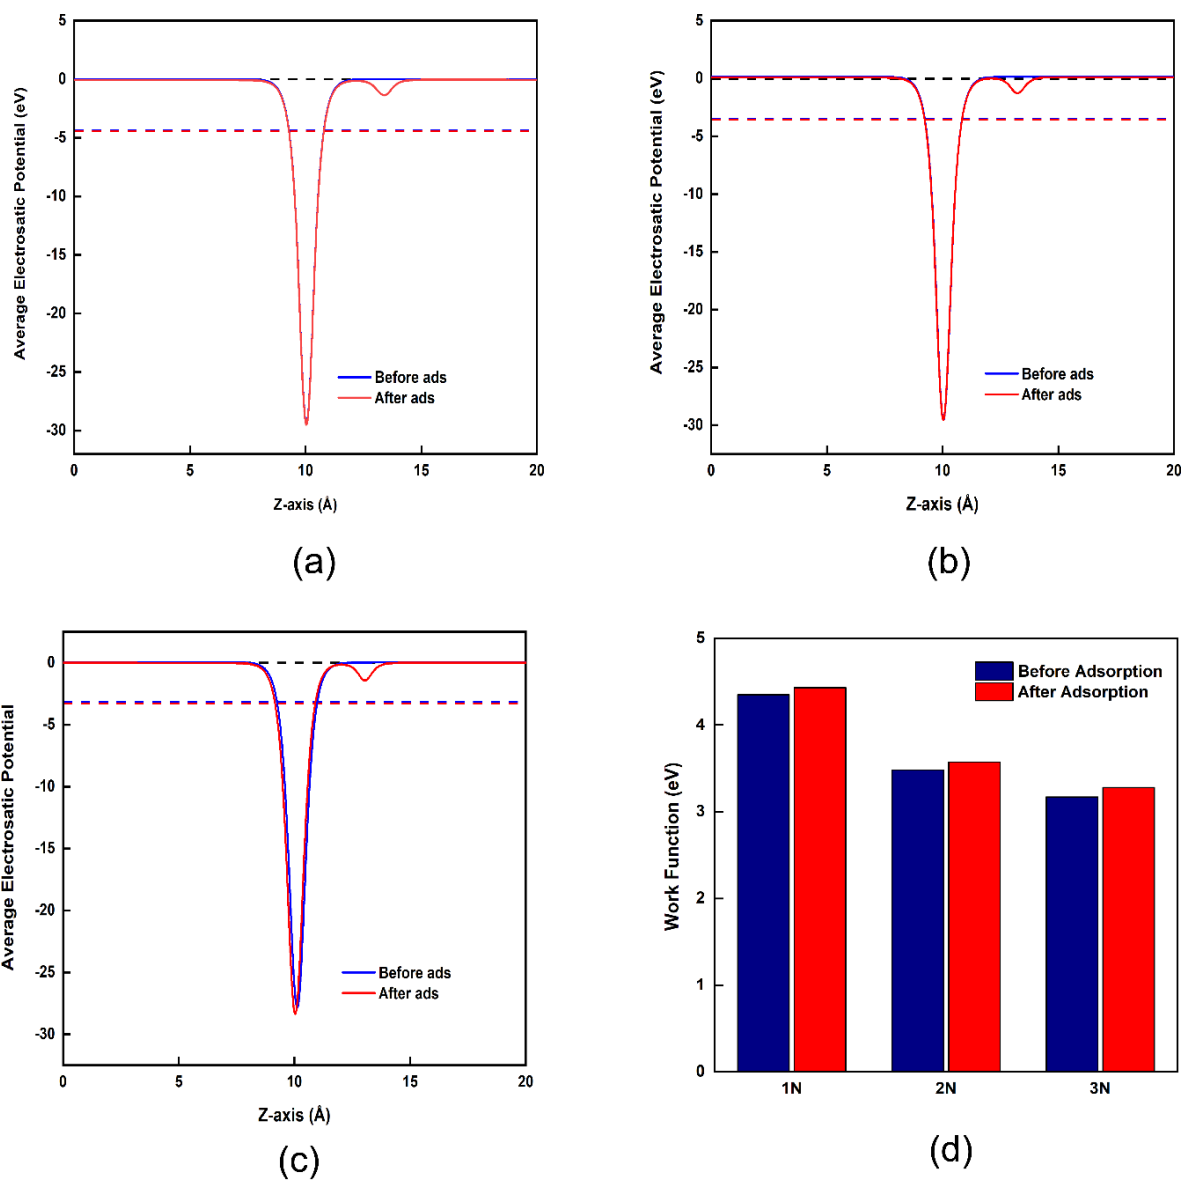

**Figure S4:** Average Electrostatic Potential plots of (a) 1N- $\gamma$ -graphyne, (b) 2N- $\gamma$ -graphyne, (c) 3N- $\gamma$ -graphyne, and (d) Work function ( $\phi$ ) plots before and after adsorption of  $\text{H}_2\text{CO}$  molecule.

## **References**

1. A. Ruiz-Puigdollers and P. Gamallo, *Carbon*, 2017, **114**, 301-310.
2. X. Deng, J. Zeng, M. Si, and W. Lu, *Europhys. Lett.*, 2016, **115**, 27009 (p1-p6).
